# Supplementary material
Source: PubMed Central journal article supplement (PMC3215076)
Supplement: 1106550108_pnas.201106550SI.pdf [file 1106550108_pnas.201106550SI.pdf]

# Supporting Information

Zhao et al. 10.1073/pnas.1106550108

## SI Methods

**Cell Lines and Culture.** All cell lines were cultured in RPMI medium 1640 (Gibco) supplemented with 10% FBS, 2 mM L-glutamine, 100 U/mL penicillin, and 100  $\mu$ g/mL streptomycin (i.e., complete RPMI) at 37 °C, 5% CO<sub>2</sub>. B16F10 and SKBR-3 cells were passaged and harvested by enzymatic treatment with trypsin (0.05%), EDTA (0.02%), PBS solution. Knockdown of CD47 in SKBR-3 cells was performed using CD47 shRNA (5'-CCGG-GCACAATTACTTGGACTAGTTCTCGAGAACTAGTCCA-AGTAATTGTGCTTTTT-3') that was introduced into the cells by lentiviral transduction according to instructions provided by the manufacturer (Sigma). CHO cells were transfected with full-length human signal-regulatory protein (SIRP) $\alpha_1$ , SIRP $\alpha_{BIT}$ , SIRP $\beta_1$ , and SIRP $\gamma$  constructs and cloned by PCR from appropriate donors into pcDNA3.1 (Invitrogen) using FuGENE transfection reagent (Roche) as described by the manufacturer, and cells were selected with 50 mg/mL G418 (Gibco). Constructs were verified by Sanger sequencing. SIRP $\alpha_1$  and SIRP $\alpha_{BIT}$  expression was verified by Western blotting using rabbit anti-human SIRP $\alpha$  directed against the invariable C-terminal cytoplasmic region (Abcam8120; Abcam) and mouse anti-human  $\beta$ -actin (clone AC-15; Sigma) as a loading control. IRDye 800CW-conjugated goat anti-rabbit IgG and IRDye 680-conjugated donkey anti-mouse IgG (LI-COR Biosciences) were used as secondary antibodies, and signals were visualized in an Odyssey Infrared Imaging System (LI-COR Biosciences). SIRP $\beta_1$  and SIRP $\gamma$  expression was verified by flow cytometry using B4B6 (1) and MRC OX119 (2) mAb, respectively.

**Antibodies, CD47 Bead Binding Assay, and Flow Cytometry.** The following primary antibodies were used: anti-mouse CD47 (Miap301, rat IgG<sub>2a</sub>) (3), anti-human CD47 (B6H12, mouse IgG<sub>1</sub>) (4), either as unconjugated intact antibody, F(ab')<sub>2</sub> fragments, or PE-labeled intact antibody (Santa Cruz Biotechnology), anti-human SIRP $\beta_1$  (B4B6, mouse IgG<sub>1</sub>) (1), anti-human SIRP $\gamma$  (MRC OX119, mouse IgG<sub>1</sub>) (2), anti-human CD64 (clone 10.1, mouse IgG<sub>1</sub>; BD Pharmingen), anti-human CD32 (clone AT10, mouse IgG<sub>1</sub>; AbD Serotec), anti-human CD16 (clone 3G8, mouse IgG<sub>2b</sub>; BD Pharmingen), anti-mouse melanoma antigen gp75 (TA99, mouse IgG<sub>2a</sub>) (5), and anti-human Her2/Neu (trastuzumab, human IgG<sub>1</sub>; Roche). Where applicable, antibodies were produced in protein-free hybridoma medium containing 2% low-IgG FCS and purified by protein G- or protein A- Sepharose affinity chromatography. B6H12 F(ab')<sub>2</sub> fragments were generated by pepsin digestion. For flow cytometry, cells were collected as indicated, washed, and incubated in FACS buffer (PBS containing 0.1% BSA) with saturating concentrations of primary antibody for 30 min on ice. After washing, the cells were incubated with either Alexa 633-labeled anti-rat IgG antibody (Molecular Probes), Alexa 633-labeled anti-mouse IgG antibody (Invitrogen, Molecu-

lar Probes), or FITC-labeled anti-human IgG (M1325, mouse IgG<sub>2b</sub>; Sanquin).

The primers 5'-GAGATCGATATCCAGCTACTATTAA-TAAAACAAAATC-3' (forward) and 5'-GAGATCAGATCTA-AACCATGAAACAACACGATATTTT-3' (reverse) were used to amplify cDNA encoding the extracellular Ig domain of human CD47 and to clone it, using the EcoRV and BglII restriction sites, into the pFUSE IgG<sub>1</sub> Fc vector. The construct was verified by sequencing. The resulting fusion protein was produced by transfecting freestyle HEK293T cells (Invitrogen) according to instructions provided by the manufacturer. The CD47-Fc protein was purified by protein G-Sepharose affinity chromatography from the culture supernatant and tested for reactivity in Western blotting with anti-human CD47 and anti-human IgG antibodies. Fluorescent beads (carboxylate-modified TransFluoSpheres 488/645; Invitrogen) were covalently coated with streptavidin and subsequently used to capture biotinylated goat anti-human Fc (Jackson ImmunoResearch), followed by CD47-Fc. The beads were stored in PBS, 0.5% BSA, 0.02% NaN<sub>3</sub> (stock 1% NaN<sub>3</sub> in H<sub>2</sub>O) and used for experiments within 3 mo. Binding to cells was done by incubating 50  $\times$  10<sup>3</sup> cells with 20  $\mu$ L of CD47 beads diluted 1:10 in PBS, 0.1% BSA for 45 min at 37 °C followed by a single washing step and flow cytometric analysis on a FACSCalibur flow cytometer (BD Biosciences) equipped with FlowJo software (Tree Star).

**Production of Monoclonal Antibodies.** The extracellular domains (ECDs) of human SIRP $\alpha_1$  corresponding to amino acids 1–364 and 1–365 were cloned using forward TOPO primer 3'-CAC-CATGGAGCCCGCCGCC-5' and reverse primer 3'-GAA-TAGCAGTAGCAGTCACAAGAGTCGCCGCATAAAC-5' into pCDNA 3.1D/V5-HIS-TOPO vector (Invitrogen). The C-terminal HIS-tagged SIRP $\alpha_1$ -ECD proteins were produced in freestyle HEK293T cells as indicated above and purified on Ni columns using a Ni-NTA Fast Start Kit (Qiagen). The HIS tags were removed by enterokinase cleavage using an enterokinase cleavage capture kit (Novagen), and the remaining SIRP $\alpha_1$ -ECD protein was dialyzed against PBS. Removal of the HIS tag was confirmed by Western blotting. Female BALB/c mice were immunized five times with 20  $\mu$ g of SIRP $\alpha_1$ -ECD protein or five times with SIRP $\alpha_1$ -expressing CHO cells diluted in 50  $\mu$ L of PBS and 50  $\mu$ L of montanide adjuvant. The hybridomas 12C4 and 1.23A were generated, respectively, by standard hybridoma technology or by negative and positive panning, respectively, on SIRP $\beta_1$ - and SIRP $\alpha_1$ -expressing CHO cells followed by electrofusion technology (6). This was followed by repeated screening by ELISA and flow cytometry for reactive clones and subcloning by limiting dilution. Antibodies were produced by culture in serum-free/low-IgG medium and purified by protein-G-Sepharose affinity chromatography and dialyzed against PBS. Both antibodies were of the IgG<sub>1</sub> isotype.

- Seiffert M, et al. (2001) Signal-regulatory protein  $\alpha$  (SIRP $\alpha$ ) but not SIRP $\beta$  is involved in T-cell activation, binds to CD47 with high affinity, and is expressed on immature CD34(+)CD38(-) hematopoietic cells. *Blood* 97:2741–2749.
- Brooke G, Holbrook JD, Brown MH, Barclay AN (2004) Human lymphocytes interact directly with CD47 through a novel member of the signal regulatory protein (SIRP) family. *J Immunol* 173:2562–2570.
- Lindberg FP, et al. (1996) Decreased resistance to bacterial infection and granulocyte defects in IAP-deficient mice. *Science* 274:795–798.
- Latour S, et al. (2001) Bidirectional negative regulation of human T and dendritic cells by CD47 and its cognate receptor signal-regulator protein- $\alpha$ : Down-regulation of IL-

- 12 responsiveness and inhibition of dendritic cell activation. *J Immunol* 167:2547–2554.
- Hara I, Takechi Y, Houghton AN (1995) Implicating a role for immune recognition of self in tumor rejection: Passive immunization against the brown locus protein. *J Exp Med* 182:1609–1614.
- Steenbakkers PG, Hubers HA, Rijnders AW (1994) Efficient generation of monoclonal antibodies from preselected antigen-specific B cells. Efficient immortalization of preselected B cells. *Mol Biol Rep* 19:125–134.

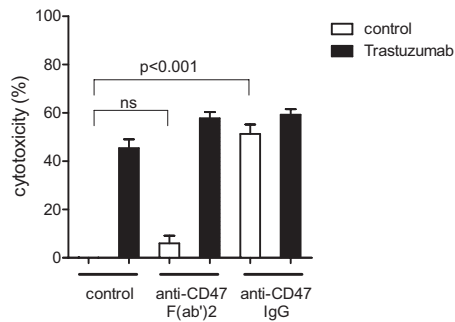

**Fig. S1.** Antibody-dependent cellular cytotoxicity of human neutrophils toward SKBR-3 breast cancer cells after preincubation with trastuzumab (10  $\mu\text{g}/\text{mL}$ ) and/or B6H12 (10  $\mu\text{g}/\text{mL}$ ) anti-CD47 F(ab)<sub>2</sub> or intact IgG. Values shown are means  $\pm$  SD ( $n = 3$ ) from a representative experiment out of three. Note that intact anti-CD47 IgG alone but not anti-CD47 F(ab)<sub>2</sub> induces neutrophil-mediated cytotoxicity.  $P$  values of statistically significant differences, as determined by Student's  $t$  test, are indicated. ns, nonsignificant.

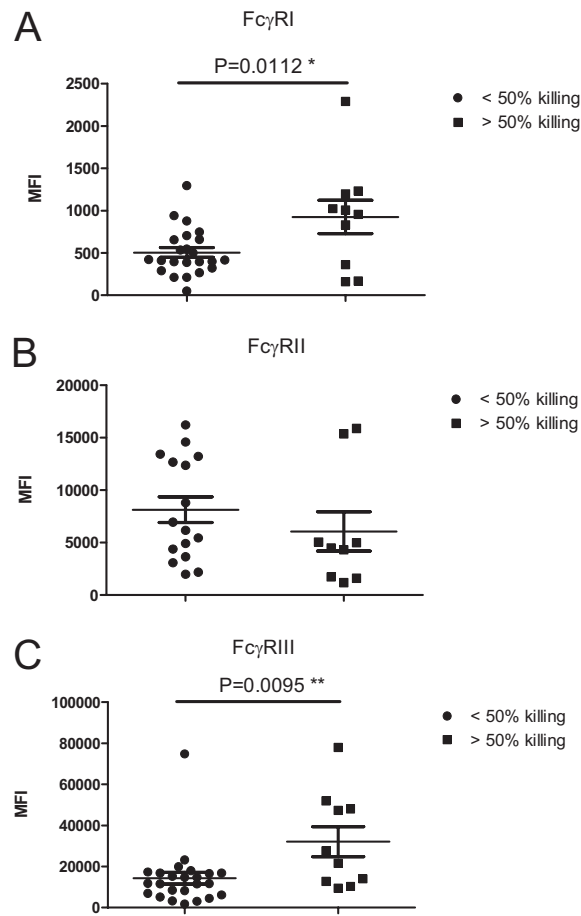

**Fig. S2.** Relationship between trastuzumab-induced neutrophil-mediated cytotoxicity against SKBR-3 cells and FcR expression. Experiments ( $n = 25$ ) with individual neutrophil donors were divided into two groups based on high (above 50%) or low (below 50%) trastuzumab-dependent killing capacity. Surface expression levels (MFI) measured by flow cytometry of Fc $\gamma$ RI (A) (using mAb 10.1, mouse IgG<sub>1</sub>; BD Pharmingen), Fc $\gamma$ RII (B) (using mAb AT10, mouse IgG<sub>1</sub>; AbD Serotec), and Fc $\gamma$ RIII (C) (clone 3G8, mouse IgG<sub>2b</sub>; BD Pharmingen) combined with Alexa 633-labeled anti-mouse IgG antibody (Invitrogen, Molecular Probes) are shown. Note that statistically higher killing is associated with higher Fc $\gamma$ RI and Fc $\gamma$ RIII levels.  $P$  values of statistically significant differences, as determined by Student's  $t$  test, are indicated.
